# Supplementary material
Source: PubMed Central journal article supplement (PMC8546627)

## Supplementary Online Content

Lim CCW, Sun T, Leung J, et al. Prevalence of adolescent cannabis vaping: a systematic review and meta-analysis of US and Canadian studies. *JAMA Pediatr*. Published online October 25, 2021. doi:10.1001/jamapediatrics.2021.4102

**eAppendix 1.** Updated PRISMA 2020 Statement Checklist

**eAppendix 2.** MOOSE Guideline Checklist

**eAppendix 3.** Search Terms for Each Database

**eAppendix 4.** Cannabis Vaping Questions in Each Study

**eAppendix 5.** Study Quality Based on Modified Newcastle-Ottawa Scale for Cross-Sectional Studies

**eAppendix 6.** Meta-analysis of Prevalence by Survey Year and Age Groups (US ONLY)

**eAppendix 7.** Studies Included for Full-Text Screening (n = 290)

**eAppendix 8.** Included Studies From Citation Screening

**eFigure.** Funnel Plot Lifetime, 12-Month and 30-Day Prevalence

This supplementary material has been provided by the authors to give readers additional information about their work.

| <b>eAppendix 1. Updated PRISMA 2020 Statement checklist</b> |                               |                                                                                                                                                                                                                                                             |                                                                                                                                                                                                                                                                                                      |             |
|-------------------------------------------------------------|-------------------------------|-------------------------------------------------------------------------------------------------------------------------------------------------------------------------------------------------------------------------------------------------------------|------------------------------------------------------------------------------------------------------------------------------------------------------------------------------------------------------------------------------------------------------------------------------------------------------|-------------|
| <b>Section and Topic</b>                                    |                               | <b>#</b>                                                                                                                                                                                                                                                    | <b>Checklist item</b>                                                                                                                                                                                                                                                                                | <b>Page</b> |
| <b>TITLE</b>                                                | Title                         | 1                                                                                                                                                                                                                                                           | Identify the report as a systematic review.                                                                                                                                                                                                                                                          | 1           |
| <b>ABSTRACT</b>                                             | Abstract                      | 2                                                                                                                                                                                                                                                           | <a href="#">Title, Background, Methods, Results, Discussion, Other Funding, Registration</a>                                                                                                                                                                                                         | 1           |
| <b>INTRODUCTION</b>                                         | Rationale                     | 3                                                                                                                                                                                                                                                           | Describe the rationale for the review in the context of existing knowledge.                                                                                                                                                                                                                          | 2           |
|                                                             | Objectives                    | 4                                                                                                                                                                                                                                                           | Provide an explicit statement of the objective(s) or question(s) the review addresses.                                                                                                                                                                                                               | 2           |
| <b>METHODS</b>                                              | Eligibility criteria          | 5                                                                                                                                                                                                                                                           | Specify the inclusion and exclusion criteria for the review and how studies were grouped for the syntheses.                                                                                                                                                                                          | 2           |
|                                                             | Information sources           | 6                                                                                                                                                                                                                                                           | Specify all databases, registers, websites, organisations, reference lists and other sources searched or consulted to identify studies. Specify the date when each source was last searched or consulted.                                                                                            | 2           |
|                                                             | Search strategy               | 7                                                                                                                                                                                                                                                           | Present the full search strategies for all databases, registers and websites, including any filters and limits used.                                                                                                                                                                                 | E3          |
|                                                             | Selection process             | 8                                                                                                                                                                                                                                                           | Specify the methods used to decide whether a study met the inclusion criteria of the review, including how many reviewers screened each record and each report retrieved, whether they worked independently, and if applicable, details of automation tools used in the process.                     | 2           |
|                                                             | Data collection process       | 9                                                                                                                                                                                                                                                           | Specify the methods used to collect data from reports, including how many reviewers collected data from each report, whether they worked independently, any processes for obtaining or confirming data from study investigators, and if applicable, details of automation tools used in the process. | 2           |
|                                                             | Data items                    | 10a                                                                                                                                                                                                                                                         | List and define all outcomes for which data were sought. Specify whether all results that were compatible with each outcome domain in each study were sought (e.g. for all measures, time points, analyses), and if not, the methods used to decide which results to collect.                        | 3           |
|                                                             |                               | 10b                                                                                                                                                                                                                                                         | List and define all other variables for which data were sought (e.g. participant and intervention characteristics, funding sources). Describe any assumptions made about any missing or unclear information.                                                                                         | 3           |
|                                                             | Study risk of bias assessment | 11                                                                                                                                                                                                                                                          | Specify the methods used to assess risk of bias in the included studies, including details of the tool(s) used, how many reviewers assessed each study and whether they worked independently, and if applicable, details of automation tools used in the process.                                    | 3           |
|                                                             | Effect measures               | 12                                                                                                                                                                                                                                                          | Specify for each outcome the effect measure(s) (e.g. risk ratio, mean difference) used in the synthesis or presentation of results.                                                                                                                                                                  | 3           |
|                                                             | Synthesis methods             | 13a                                                                                                                                                                                                                                                         | Describe the processes used to decide which studies were eligible for each synthesis.                                                                                                                                                                                                                | 2-3         |
|                                                             | 13b                           | Describe any methods required to prepare the data for presentation or synthesis, such as handling of missing summary statistics, or data conversions.                                                                                                       | 3                                                                                                                                                                                                                                                                                                    |             |
|                                                             | 13c                           | Describe any methods used to tabulate or visually display results of individual studies and syntheses.                                                                                                                                                      | 3                                                                                                                                                                                                                                                                                                    |             |
|                                                             | 13d                           | Describe any methods used to synthesize results and provide a rationale for the choice(s). If meta-analysis was performed, describe the model(s), method(s) to identify the presence and extent of statistical heterogeneity, and software package(s) used. | 3                                                                                                                                                                                                                                                                                                    |             |
|                                                             | 13e                           | Describe any methods used to explore possible causes of heterogeneity among study results.                                                                                                                                                                  | 3                                                                                                                                                                                                                                                                                                    |             |
|                                                             | 13f                           | Describe any sensitivity analyses conducted to assess robustness of the synthesized results.                                                                                                                                                                | 5                                                                                                                                                                                                                                                                                                    |             |

|                          |                                                |     |                                                                                                                                                                                                                                                                                      |      |
|--------------------------|------------------------------------------------|-----|--------------------------------------------------------------------------------------------------------------------------------------------------------------------------------------------------------------------------------------------------------------------------------------|------|
|                          | Reporting bias assessment                      | 14  | Describe any methods used to assess risk of bias due to missing results in a synthesis (arising from reporting biases).                                                                                                                                                              | 3    |
|                          | Certainty assessment                           | 15  | Describe any methods used to assess certainty (or confidence) in the body of evidence for an outcome.                                                                                                                                                                                | 3    |
| <b>RESULTS</b>           | Study selection                                | 16a | Describe the results of the search and selection process, from the number of records identified in the search to the number of studies included in the review, ideally using a flow diagram (see Figure 1).                                                                          | Fig1 |
|                          |                                                | 16b | Cite studies that met many but not all inclusion criteria ('near-misses') and explain why they were excluded.                                                                                                                                                                        | 3    |
|                          | Study characteristics                          | 17  | Cite each included study and present its characteristics.                                                                                                                                                                                                                            | 3,5  |
|                          | Risk of bias in studies                        | 18  | Present assessments of risk of bias for each included study.                                                                                                                                                                                                                         | T1   |
|                          | Results of individual studies                  | 19  | For all outcomes, present, for each study: (a) summary statistics for each group (where appropriate) and (b) an effect estimate and its precision (e.g. confidence/credible interval), ideally using structured tables or plots.                                                     | T2   |
|                          | Results of syntheses                           | 20a | For each synthesis, briefly summarize the characteristics and risk of bias among contributing studies.                                                                                                                                                                               | 5    |
|                          |                                                | 20b | Present results of all statistical syntheses conducted. If meta-analysis was done, present for each the summary estimate and its precision (e.g. confidence/credible interval) and measures of statistical heterogeneity. If comparing groups, describe the direction of the effect. | 5    |
|                          |                                                | 20c | Present results of all investigations of possible causes of heterogeneity among study results.                                                                                                                                                                                       | 5    |
|                          |                                                | 20d | Present results of all sensitivity analyses conducted to assess the robustness of the synthesized results.                                                                                                                                                                           | 5    |
|                          | Reporting biases                               | 21  | Present assessments of risk of bias due to missing results (arising from reporting biases) for each synthesis assessed.                                                                                                                                                              | n/a  |
|                          | Certainty of evidence                          | 22  | Present assessments of certainty (or confidence) in the body of evidence for each outcome assessed.                                                                                                                                                                                  | 5    |
| <b>DISCUSSION</b>        | Discussion                                     | 23a | Provide a general interpretation of the results in the context of other evidence.                                                                                                                                                                                                    | 6-8  |
|                          |                                                | 23b | Discuss any limitations of the evidence included in the review.                                                                                                                                                                                                                      | 8    |
|                          |                                                | 23c | Discuss any limitations of the review processes used.                                                                                                                                                                                                                                | 8    |
|                          |                                                | 23d | Discuss implications of the results for practice, policy, and future research.                                                                                                                                                                                                       | 8    |
| <b>OTHER INFORMATION</b> | Registration and protocol                      | 24a | Provide registration information for the review, including register name and registration number, or state that the review was not registered.                                                                                                                                       | 1    |
|                          |                                                | 24b | Indicate where the review protocol can be accessed, or state that a protocol was not prepared.                                                                                                                                                                                       | 1    |
|                          |                                                | 24c | Describe and explain any amendments to information provided at registration or in the protocol.                                                                                                                                                                                      | n/a  |
|                          | Support                                        | 25  | Describe sources of financial or non-financial support for the review, and the role of the funders or sponsors in the review.                                                                                                                                                        | 8    |
|                          | Competing interests                            | 26  | Declare any competing interests of review authors.                                                                                                                                                                                                                                   | 8    |
|                          | Availability of data, code and other materials | 27  | Report which of the following are publicly available and where they can be found: template data collection forms; data extracted from included studies; data used for all analyses; analytic code; any other materials used in the review.                                           | 3    |

| <b>eAppendix 2. MOOSE Guideline checklist</b>                                                                                                                                                                                                                                |               |
|------------------------------------------------------------------------------------------------------------------------------------------------------------------------------------------------------------------------------------------------------------------------------|---------------|
| <b>Items</b>                                                                                                                                                                                                                                                                 | <b>Page</b>   |
| <b>1) Reporting of background should include</b>                                                                                                                                                                                                                             |               |
| Problem definition                                                                                                                                                                                                                                                           | 2             |
| Hypothesis statement                                                                                                                                                                                                                                                         | N/A           |
| Description of study outcome(s)                                                                                                                                                                                                                                              | 2             |
| Type of exposure or intervention used Type of study designs used                                                                                                                                                                                                             | 2             |
| Study population                                                                                                                                                                                                                                                             | 2             |
| <b>2) Reporting of search strategy should include</b>                                                                                                                                                                                                                        |               |
| Qualifications of searchers (eg, librarians and investigators)                                                                                                                                                                                                               | 1,8           |
| Search strategy, including time period included in the synthesis and keywords                                                                                                                                                                                                | eAppendix 3   |
| Effort to include all available studies, including contact with authors                                                                                                                                                                                                      | 3             |
| Databases and registries searched                                                                                                                                                                                                                                            | 2             |
| Search software used, name and version, including special features used (eg, explosion)                                                                                                                                                                                      | 3             |
| Use of hand searching (eg, reference lists of obtained articles)                                                                                                                                                                                                             | 2             |
| List of citations located and those excluded, including justification                                                                                                                                                                                                        | eAppendix 6-7 |
| Method of addressing articles published in languages other than English                                                                                                                                                                                                      | 2             |
| Method of handling abstracts and unpublished studies                                                                                                                                                                                                                         | 2             |
| Description of any contact with authors                                                                                                                                                                                                                                      | 2             |
| <b>3) Reporting of methods should include</b>                                                                                                                                                                                                                                |               |
| Description of relevance or appropriateness of studies assembled for assessing the hypothesis to be tested                                                                                                                                                                   | N/A           |
| Rationale for the selection and coding of data (eg, sound clinical principles or convenience) Documentation of how data were classified and coded (eg, multiple raters, blinding, and interrater reliability)                                                                | 2             |
| Assessment of confounding (eg, comparability of cases and controls in studies where appropriate)                                                                                                                                                                             | N/A           |
| Assessment of study quality, including blinding of quality assessors; stratification or regression on possible predictors of study results                                                                                                                                   | 3             |
| Assessment of heterogeneity                                                                                                                                                                                                                                                  | 5             |
| Description of statistical methods (eg, complete description of fixed or random effects models, justification of whether the chosen models account for predictors of study results, dose-response models, or cumulative meta-analysis) in sufficient detail to be replicated | 3             |
| Provision of appropriate tables and graphics                                                                                                                                                                                                                                 | Yes           |
| <b>4) Reporting of results should include</b>                                                                                                                                                                                                                                |               |
| Graphic summarizing individual study estimates and overall estimate Table giving descriptive information for each study included                                                                                                                                             | Yes           |
| Results of sensitivity testing (eg, subgroup analysis)                                                                                                                                                                                                                       | eAppendix 5   |

|                                                                                                                           |         |
|---------------------------------------------------------------------------------------------------------------------------|---------|
| Indication of statistical uncertainty of findings                                                                         | Table 2 |
| <b>5) Reporting of discussion should include</b>                                                                          |         |
| Quantitative assessment of bias (eg, publication bias)                                                                    | eFig1   |
| Justification for exclusion (eg, exclusion of non-English-language citations) Assessment of quality of included studies   | N/A     |
| <b>6) Reporting of conclusions should include</b>                                                                         |         |
| Consideration of alternative explanations for observed results                                                            | 6-8     |
| Generalization of the conclusions (ie, appropriate for the data presented and within the domain of the literature review) | 8       |
| Guidelines for future research                                                                                            | 8       |
| Disclosure of funding source                                                                                              | 8       |

| <b>eAppendix 3. Search terms for each database</b> |                                                                                                                                                                                                                                                                                                                                                                                                                                                                                                                                                                                                                                                                                                                                                                                                                                                                                                                                                                                                              |
|----------------------------------------------------|--------------------------------------------------------------------------------------------------------------------------------------------------------------------------------------------------------------------------------------------------------------------------------------------------------------------------------------------------------------------------------------------------------------------------------------------------------------------------------------------------------------------------------------------------------------------------------------------------------------------------------------------------------------------------------------------------------------------------------------------------------------------------------------------------------------------------------------------------------------------------------------------------------------------------------------------------------------------------------------------------------------|
| <b>Database</b>                                    | <b>Search terms for original studies</b>                                                                                                                                                                                                                                                                                                                                                                                                                                                                                                                                                                                                                                                                                                                                                                                                                                                                                                                                                                     |
| <b>PUBMED<br/>Search Query</b>                     | ((cannabis[Title/Abstract] OR (marijuana [Title/Abstract]) OR (marihuana[Title/Abstract]) OR cannabis[MeSH Terms] OR marijuana use[MeSH Terms])) AND ((ecig*[Title/Abstract] OR (e-cig*[Title/Abstract] OR ("electronic cigarette"[Title/Abstract]) OR ("electronic cigarettes"[Title/Abstract]) OR ("electronic nicotine delivery"[Title/Abstract]) OR (eliquid*[Title/Abstract] OR (e-liquid*[Title/Abstract]) OR (vape[Title/Abstract]) OR (vaping[Title/Abstract]) OR (vaporize*[Title/Abstract]) OR (EVALI[Title/Abstract]) OR ("vaping associated lung injury"[Title/Abstract]) OR (Electronic nicotine delivery systems[MeSH Terms]) OR (vaping[MeSH Terms]) OR ("vaping/adverse effects"[MeSH Terms])) Filters: from 2003 - 2020                                                                                                                                                                                                                                                                     |
| <b>SCOPUS<br/>Search Query</b>                     | ( TITLE-ABS-KEY ( ecig* ) OR TITLE-ABS-KEY ( e-cig* ) OR TITLE-ABS-KEY ( "electronic cigarette" ) OR TITLE-ABS-KEY ( "electronic cigarettes" ) OR TITLE-ABS-KEY ( "electronic nicotine delivery" ) OR TITLE-ABS-KEY ( eliquid* ) OR TITLE-ABS-KEY ( e-liquid* ) OR TITLE-ABS-KEY ( vape* ) OR TITLE-ABS-KEY ( vaping ) OR TITLE-ABS-KEY ( vaporize* ) OR TITLE-ABS-KEY ( EVALI ) OR TITLE-ABS-KEY ( "vaping associated lung injury" ) ) AND ( TITLE-ABS-KEY ( cannabis ) OR TITLE-ABS-KEY ( marijuana ) OR TITLE-ABS-KEY ( marihuana ) ) AND ( PUBYEAR > 2002 )                                                                                                                                                                                                                                                                                                                                                                                                                                              |
| <b>PsycInfo<br/>Search Query</b>                   | ((title: (cannabis) OR title: (marijuana) OR title: (marihuana)) OR (abstract: (cannabis) OR abstract: (marijuana) OR abstract: (marihuana)) OR (Index Terms: (cannabis) OR (Index Terms: (marijuana)))) AND ((Year: [2003 TO 2020])) AND (((title: (ecig*) OR title: (e-cig*) OR title: ("electronic cigarette") OR title: ("electronic cigarettes") OR title: ("electronic nicotine delivery") OR title: (eliquid*) OR title: (e-liquid*) OR title: (vape*) OR title: (vaping) OR title: (vaporize*) OR title: (EVALI) OR title: ("vaping associate lung injury")) OR (abstract: (ecig*) OR abstract: (e-cig*) OR abstract: ("electronic cigarette") OR abstract: ("electronic cigarettes") OR abstract: ("electronic nicotine delivery") OR abstract: (eliquid*) OR abstract: (e-liquid*) OR abstract: (vape*) OR abstract: (vaping) OR abstract: (vaporize*) OR abstract: (EVALI) OR abstract: ("vaping associate lung injury")) OR (Index Terms: (electronic cigarettes))) AND ((Year: [2003 TO 2020])) |
| <b>Web of Science<br/>Search Query</b>             | TOPIC: ((ecig* OR e-cig* OR "electronic cigarette" OR "electronic cigarettes" OR "electronic nicotine delivery" OR eliquid* OR e-liquid* OR vape* OR vaping OR vaporize* OR EVALI OR "vaping associated lung injury")) AND TOPIC:(cannabis OR marijuana OR marihuana)) Timespan: 2003-2020                                                                                                                                                                                                                                                                                                                                                                                                                                                                                                                                                                                                                                                                                                                   |
| <b>Database</b>                                    | <b>Search terms for existing reviews</b>                                                                                                                                                                                                                                                                                                                                                                                                                                                                                                                                                                                                                                                                                                                                                                                                                                                                                                                                                                     |
| <b>PUBMED<br/>Search Query</b>                     | ( Meta-review [TIAB] ) OR ( Meta-Analysis [TIAB] ) OR ( meta-ana [TIAB] ) OR ( meta analysis [TIAB] ) OR ( meta ana [TIAB] ) OR ( metaanalysis [TIAB] ) OR ( metaana* [TIAB] ) OR ( Review [TIAB] ) OR ( Systematic Review [TIAB] ) OR ( META-ANALYSIS AS TOPIC [MeSH Terms] ) OR ( SYSTEMATIC REVIEWS AS TOPIC [MeSH Terms] )                                                                                                                                                                                                                                                                                                                                                                                                                                                                                                                                                                                                                                                                               |
| <b>SCOPUS<br/>Search Query</b>                     | (TITLE-ABS-KEY("meta-review") OR TITLE-ABS-KEY("meta-analysis") OR TITLE-ABS-KEY("meta-ana") OR TITLE-ABS-KEY("meta analysis") OR TITLE-ABS-KEY(meta ana) OR TITLE-ABS-KEY(metaanalysis) OR TITLE-ABS-KEY(metaana*) OR TITLE-ABS-KEY(review) OR TITLE-ABS-KEY("systematic review"))                                                                                                                                                                                                                                                                                                                                                                                                                                                                                                                                                                                                                                                                                                                          |
| <b>PsycInfo<br/>Search Query</b>                   | (title: (meta-review OR meta-analysis OR meta-ana OR "meta analysis" OR "meta ana" OR metaanalysis OR metaana* OR review OR "systematic review) OR Abstract:(meta-review OR meta-analysis OR meta-ana OR "meta analysis " OR " meta ana " OR metaanalysis OR metaana* OR review OR " systematic review) OR (Index Terms: ("systematic review")) OR (Index Terms: (review)) OR (Index Terms: ("meta analysis"))                                                                                                                                                                                                                                                                                                                                                                                                                                                                                                                                                                                               |
| <b>Web of Science<br/>Search Query</b>             | meta-review OR meta-analysis OR meta-ana OR 'meta analysis' OR 'meta ana' OR metaanalysis OR metaana* OR 'systematic review' OR review                                                                                                                                                                                                                                                                                                                                                                                                                                                                                                                                                                                                                                                                                                                                                                                                                                                                       |

| <b>eAppendix 4. Cannabis vaping questions in each study</b> |               |             |                                                                                                                                                                                                                                                                                                                                                                                                                                                                                                                                                                                                                             |
|-------------------------------------------------------------|---------------|-------------|-----------------------------------------------------------------------------------------------------------------------------------------------------------------------------------------------------------------------------------------------------------------------------------------------------------------------------------------------------------------------------------------------------------------------------------------------------------------------------------------------------------------------------------------------------------------------------------------------------------------------------|
| <b>Study</b>                                                | <b>Survey</b> | <b>Year</b> | <b>Question</b>                                                                                                                                                                                                                                                                                                                                                                                                                                                                                                                                                                                                             |
| Trivers (2018)                                              | NYTS          | 2016        | <i>Cannabis use in e-cigarettes was determined by the response “Yes, I have used an e-cigarette device with marijuana, THC [tetrahydrocannabinol] or hash oil, or THC wax,” to the question “Have you ever used an e-cigarette device with a substance besides nicotine?” Other response options included using another substance other than cannabis, using nicotine only, or never using an e-cigarette device.</i>                                                                                                                                                                                                       |
| Dai (2020)                                                  | NYTS          | 2017-18     | <i>“Have you ever used marijuana, marijuana concentrates, marijuana waxes, THC, or hash oils in an e-cigarette?”</i>                                                                                                                                                                                                                                                                                                                                                                                                                                                                                                        |
| Miech (2020)                                                | MTF           | 2017-19     | <i>“On how many days (if any) have you vaped marijuana?” with the time periods of “during the last 30 days,” “during the last 12 months,” and “in your lifetime.”</i>                                                                                                                                                                                                                                                                                                                                                                                                                                                       |
| Bentivegna (2020)                                           | PATH (Wave 3) | 2015-16     | <i>“Have you ever used marijuana, marijuana concentrates, marijuana waxes, THC, or hash oils in an [electronic product]? (0 occasions, 1–2, 3–5, 6–9, 10–19, 20–39, and 40 or more). Two dichotomous marijuana measures were coded for analysis: any marijuana use prevalence (0,1)”</i>                                                                                                                                                                                                                                                                                                                                    |
| Morean (2015)                                               | -             | 2014        | <i>“Which of the following have you used to smoke marijuana?” Answer choices included “e-cigarettes filled with hash oil,” “e-cigarettes filled with a wax plug,” “portable vaporizers filled with dried marijuana (like a G-pen),” and “other.”</i>                                                                                                                                                                                                                                                                                                                                                                        |
| Mammen (2016)                                               | OSDUHS        | 2015        | <i>“Used e-cigarettes in the previous 12 months for marijuana, hash oil, liquid, or wax.”</i>                                                                                                                                                                                                                                                                                                                                                                                                                                                                                                                               |
| Wardell (2021)                                              | OSDUHS        | 2016-17     | <i>“Participants reported cannabis used were also asked routes of cannabis administration they used in the past 12 months”</i>                                                                                                                                                                                                                                                                                                                                                                                                                                                                                              |
| Kowitt (2019)                                               | NCYTS         | 2017        | <i>Have you ever used an e-cigarette device with a substance besides nicotine? Participants could choose one or more of the following response options: (1) Yes, I have used an e-cigarette device with marijuana, THC or hash oil, or THC wax; (2) Yes, I have used an e-cigarette device with another substance that is not marijuana, THC or hash oil, or THC wax; (3)</i>                                                                                                                                                                                                                                               |
| Doggett (2020)                                              | COMPASS       | 2017-18     | <i>‘If you have used marijuana or cannabis in the last 12 months, how did you use it?’ Response options included ‘I have used it by smoking it (e.g. in a joint, a pipe, a bong),’ ‘I have used it by vaping it,’ ‘I have used it by eating or drinking it (e.g. in brownies, cookies, candies, tea)’ and ‘I have not used marijuana or cannabis in the last 12 months.’</i>                                                                                                                                                                                                                                                |
| Eggers (2017)                                               | FYTS          | 2015        | <i>“Have you ever used an electronic vapor product with marijuana oil(also called hash oil)? [I have never used an electronic vapor product/Yes/No]”</i>                                                                                                                                                                                                                                                                                                                                                                                                                                                                    |
| Barrington-Trimis (2020)                                    |               | 2013        | <i>Participants reported past 6-month use and past 30-day use of 5 cannabis products using questions derived from validated national survey items.<sup>3</sup> Cannabis products included “(1) combustible cannabis (eg, pot, weed, hash, reefer, or bud); (2) blunts (ie, cannabis rolled in tobacco leaf or cigar casing); (3) electronic device to vape cannabis or hash oil (eg, liquid pot, weed pen [vaporized cannabis]; (4) cannabis or THC food or drinks (eg, pot brownies, edibles, butter, oil) [edible cannabis]; and (5) dabbing (eg, wax, shatter, budder, butane hash oil, BHO) [cannabis concentrate].</i> |
| Johnson (2016)                                              | HKCS          | 2013        | <i>During the past 30 days, how did you most often use marijuana?” and the response options were (a) I did not use marijuana during the past 30 days, (b) I smoked it, (c) I ate it (in an edible, candy, tincture, or other food), (d) I used a vaporizer, and (e) I consumed it in some other way</i>                                                                                                                                                                                                                                                                                                                     |

|                  |                  |         |                                                                                                                                                                                                                                                                                                                                                                                                                                                                                                      |
|------------------|------------------|---------|------------------------------------------------------------------------------------------------------------------------------------------------------------------------------------------------------------------------------------------------------------------------------------------------------------------------------------------------------------------------------------------------------------------------------------------------------------------------------------------------------|
| Peters (2018)    | HHS              | 2015    | <i>"Have you ever used the following substances in your life?" and "In the last 30 days, how many total days have you used...?" (0 occasions, 1–2, 3–5, 6–9, 10–19, 20–39, and 40 or more). Two dichotomous marijuana measures were coded for analysis: any marijuana use prevalence (0,1)</i>                                                                                                                                                                                                       |
| Leventhal (2020) | HHS              | 2015    | <i>"Have you ever used the following substances in your life?" and "In the last 30 days, how many total days have you used...?" (0 occasions, 1–2, 3–5, 6–9, 10–19, 20–39, and 40 or more). Two dichotomous marijuana measures were coded for analysis: any marijuana use prevalence (0,1)</i>                                                                                                                                                                                                       |
| Nguyen (2019)    | HHS              | 2016-17 | <i>"Have you ever used the following substances in your life?" and "In the last 30 days, how many total days have you used...?" (0 occasions, 1–2, 3–5, 6–9, 10–19, 20–39, and 40 or more). Two dichotomous marijuana measures were coded for analysis: any marijuana use prevalence (0,1)</i>                                                                                                                                                                                                       |
| Hammond (2021)   | ITC (Wave 1,2,3) | 2017-19 | <i>"In the last 30 days, did you: 1. Smoke marijuana/cannabis without tobacco 2. Smoke marijuana/cannabis with tobacco in a joint or blunt 3. Use a waterpipe/bong to smoke marijuana/cannabis 4. Use a vaporizer to heat dried marijuana/cannabis leaves or herb 5. Use an e-cigarette to vape marijuana/cannabis oil or liquid 6. eat or drink marijuana in a food or beverage 7. use marijuana/ cannabis extracts including oil, wax or shatter and 8. Use another form of marijuana/cannabis</i> |
| Knapp (2019)     |                  | 2016    | <i>Adolescents were asked if they had ever used marijuana (pot, weed, and herb) and given the reminder that marijuana could include things such as leaf and buds, and also extracts and concentrates. Specific questions about vaping included type of vaporizer used most frequently to vape marijuana, whether they owned or bought a vaporizer, and types of marijuana vaped.</i>                                                                                                                 |

*Abbreviations: FYTS, Florida Youth Tobacco Survey; HHS, Happiness and Health Study; HKCS, Health Kids Colorado Survey; ITC, International Tobacco Control; MTF, Monitoring the Future; NCYTS, North Carolina Youth Tobacco Survey; NYTS, National Youth Tobacco Survey; OSDUHS, Ontario Student Drug Use and Health Survey; PATH, Population Assessment of Tobacco and Health;*



| eAppendix 5. Study quality based on modified Newcastle-Ottawa Scale for cross-sectional studies                                                                                                                                                                                                                                                 |                 |                                                     |                                      |                              |                                            |                                                                  |                        |
|-------------------------------------------------------------------------------------------------------------------------------------------------------------------------------------------------------------------------------------------------------------------------------------------------------------------------------------------------|-----------------|-----------------------------------------------------|--------------------------------------|------------------------------|--------------------------------------------|------------------------------------------------------------------|------------------------|
| Study                                                                                                                                                                                                                                                                                                                                           | Study design    | Representativeness of the study sample <sup>a</sup> | Adequacy of sample size <sup>b</sup> | Non-respondents <sup>c</sup> | Assessment of cannabis vaping <sup>d</sup> | Appropriate reporting of prevalence and sample size <sup>e</sup> | Total score (out of 6) |
| Trivers (2018) <sup>33</sup>                                                                                                                                                                                                                                                                                                                    | CS              | **                                                  | *                                    | *                            | *                                          | *                                                                | 6                      |
| Peters (2018) <sup>32</sup>                                                                                                                                                                                                                                                                                                                     | CS <sup>f</sup> | *                                                   | *                                    | *                            | *                                          | *                                                                | 5                      |
| Nguyen (2019) <sup>31</sup>                                                                                                                                                                                                                                                                                                                     | CS <sup>f</sup> | *                                                   | *                                    | *                            | *                                          | *                                                                | 5                      |
| Morean (2015) <sup>7</sup>                                                                                                                                                                                                                                                                                                                      | CS              | *                                                   | *                                    |                              | *                                          | *                                                                | 4                      |
| Miech (2020) <sup>6</sup>                                                                                                                                                                                                                                                                                                                       | CS              | **                                                  | *                                    | *                            | *                                          | *                                                                | 6                      |
| Mammen (2016) <sup>5</sup>                                                                                                                                                                                                                                                                                                                      | CS              | *                                                   | *                                    |                              | *                                          | *                                                                | 4                      |
| Leventhal (2020) <sup>30</sup>                                                                                                                                                                                                                                                                                                                  | CS <sup>f</sup> | *                                                   | *                                    | *                            | *                                          | *                                                                | 5                      |
| Kowitt (2019) <sup>4</sup>                                                                                                                                                                                                                                                                                                                      | CS              | *                                                   | *                                    |                              | *                                          | *                                                                | 4                      |
| Johnson (2016) <sup>29</sup>                                                                                                                                                                                                                                                                                                                    | CS              | *                                                   | *                                    |                              | *                                          | *                                                                | 4                      |
| Eggers (2017) <sup>28</sup>                                                                                                                                                                                                                                                                                                                     | CS              | *                                                   | *                                    |                              | *                                          |                                                                  | 3                      |
| Doggett (2020) <sup>34</sup>                                                                                                                                                                                                                                                                                                                    | CS <sup>f</sup> | *                                                   | *                                    | *                            | *                                          | *                                                                | 5                      |
| Dai (2020) <sup>10</sup>                                                                                                                                                                                                                                                                                                                        | CS              | **                                                  | *                                    |                              | *                                          | *                                                                | 5                      |
| Wardell (2021) <sup>35</sup>                                                                                                                                                                                                                                                                                                                    | CS              | *                                                   | *                                    |                              | *                                          | *                                                                | 4                      |
| Hammond (2021) <sup>36</sup>                                                                                                                                                                                                                                                                                                                    | CS <sup>f</sup> | *                                                   | *                                    |                              | *                                          | *                                                                | 5                      |
| Bentivegna (2020) <sup>27</sup>                                                                                                                                                                                                                                                                                                                 | CS <sup>f</sup> | **                                                  | *                                    | *                            | *                                          | *                                                                | 6                      |
| Barrington-Trimis (2020) <sup>26</sup>                                                                                                                                                                                                                                                                                                          | CS <sup>f</sup> | *                                                   | *                                    | *                            | *                                          | *                                                                | 5                      |
| Knapp (2019) <sup>37</sup>                                                                                                                                                                                                                                                                                                                      | CS              |                                                     | *                                    |                              | *                                          | *                                                                | 3                      |
| <sup>a</sup> <b>Representativeness of the sample:</b> i) Truly representative of the average in the target population. ** (all subjects or random sampling) ii) Somewhat representative of the average in the target group. * (non-random sampling) iii) Selected group of users iv) No description of the derivation of the included subjects. |                 |                                                     |                                      |                              |                                            |                                                                  |                        |
| <sup>b</sup> <b>Adequacy of sample size:</b> i) Justified and satisfactory (n>100). * ii) Not justified iii) No information provided                                                                                                                                                                                                            |                 |                                                     |                                      |                              |                                            |                                                                  |                        |
| <sup>c</sup> <b>Non-respondents:</b> i) Comparability between respondents and non-respondent characteristics is justified in the study, or the response rate is satisfactory (>70%). * ii) Unsatisfactory response rates, no summary data on non-respondents. lii) No information provided                                                      |                 |                                                     |                                      |                              |                                            |                                                                  |                        |
| <sup>d</sup> <b>Assessment of cannabis vaping:</b> i) detailed definition of cannabis vaping provided (i.e actual wording of the question). * ii) No information provided                                                                                                                                                                       |                 |                                                     |                                      |                              |                                            |                                                                  |                        |
| <sup>e</sup> <b>Appropriate reporting of prevalence and sample size:</b> i) number of cases and total sample used is reported along with the prevalence. * ii) No information provided                                                                                                                                                          |                 |                                                     |                                      |                              |                                            |                                                                  |                        |
| <sup>f</sup> Prospective cohort study but prevalence is from a specific wave of the study.                                                                                                                                                                                                                                                      |                 |                                                     |                                      |                              |                                            |                                                                  |                        |

| <b>eAppendix 6. Meta-analysis of prevalence by survey year and age-groups (U.S. ONLY)</b> |                  |          |               |                 |          |               |                 |          |               |                 |          |               |                        |          |               |
|-------------------------------------------------------------------------------------------|------------------|----------|---------------|-----------------|----------|---------------|-----------------|----------|---------------|-----------------|----------|---------------|------------------------|----------|---------------|
|                                                                                           | <b>Grade 6-9</b> |          |               | <b>Grade 10</b> |          |               | <b>Grade 11</b> |          |               | <b>Grade 12</b> |          |               | <b>All<sup>a</sup></b> |          |               |
|                                                                                           | <b>k</b>         | <b>%</b> | <b>95% CI</b> | <b>k</b>        | <b>%</b> | <b>95% CI</b> | <b>k</b>        | <b>%</b> | <b>95% CI</b> | <b>k</b>        | <b>%</b> | <b>95% CI</b> | <b>k</b>               | <b>%</b> | <b>95% CI</b> |
| <b>Lifetime</b>                                                                           |                  |          |               |                 |          |               |                 |          |               |                 |          |               |                        |          |               |
| 2013-16                                                                                   | 16               | 3.4      | 2.6-4.6       | 4               | 10.5     | 8.1-13.6      | 4               | 13.2     | 10.2-16.9     | 4               | 14.6     | 11.3-18.6     | 18                     | 6.1      | 4.8-7.7       |
| 2017-18                                                                                   | 14               | 3.9      | 2.9-5.1       | 7               | 11.7     | 9.0-15.1      | 5               | 15.6     | 11.4-20.8     | 7               | 17.0     | 13.4-21.2     | 30                     | 6.5      | 5.4-7.9       |
| 2019-20                                                                                   | 13               | 7.2      | 5.0-10.1      | 4               | 22.9     | 17.3-29.6     | 3               | 26.9     | 18.2-37.9     | 4               | 28.1     | 21.5-35.8     | 25                     | 13.6     | 10.9-16.8     |
| <b>12-month</b>                                                                           |                  |          |               |                 |          |               |                 |          |               |                 |          |               |                        |          |               |
| 2013-16                                                                                   | -                | -        | -             | -               | -        | -             | -               | -        | -             | -               | -        | -             | -                      | -        | -             |
| 2017-18                                                                                   | 2                | 3.6      | 2.5-5.3       | 2               | 10.1     | 6.6-15.1      | -               | -        | -             | 2               | 11.2     | 8.1-15.2      | 7                      | 7.2      | 5.1-10.2      |
| 2019-20                                                                                   | 1                | 7.0      | 6.4-7.6       | 1               | 19.4     | 18.6-20.2     | -               | -        | -             | 1               | 20.8     | 19.9-21.7     | 3                      | 14.4     | 8.1-24.4      |
| <b>30-day</b>                                                                             |                  |          |               |                 |          |               |                 |          |               |                 |          |               |                        |          |               |
| 2013-16                                                                                   | 1                | 0.5      | 0.3-0.8       | 1               | 1.0      | 0.7-1.4       | 1               | 1.3      | 1.0-1.7       | 1               | 2.3      | 1.8-3.0       | 7                      | 1.6      | 0.8-2.9       |
| 2017-18                                                                                   | 2                | 2.1      | 1.3-3.3       | 2               | 5.5      | 3.4-8.8       | -               | -        | -             | 2               | 6.2      | 4.1-9.1       | 8                      | 4.6      | 3.2-6.5       |
| 2019-20                                                                                   | 1                | 3.9      | 3.5-4.3       | 1               | 12.6     | 11.9-13.3     | -               | -        | -             | 1               | 14.0     | 13.3-14.8     | 4                      | 8.4      | 5.0-13.8      |

<sup>a</sup>k do not sum across the row as some surveys administered questions to all age groups.

| <b>eAppendix 7. Studies included for full-text screening (n = 290)</b> |                                                                                                                                                                                                 |                 |
|------------------------------------------------------------------------|-------------------------------------------------------------------------------------------------------------------------------------------------------------------------------------------------|-----------------|
| <b>Study</b>                                                           | <b>Title</b>                                                                                                                                                                                    | <b>Decision</b> |
| Vangipuram et al (2020)                                                | Cannabis vape induced bronchitis                                                                                                                                                                | EXCLUDE         |
| Tyacke et al (2011)                                                    | Effects of acute inhalation of vaporized cannabis or placebo on cardiovascular and saccadic eye movement measures: a pilot study                                                                | EXCLUDE         |
| Taffe et al (2016)                                                     | Inhalation Self-Administration of Addictive Drugs via E-Cigarette Technology in Rats                                                                                                            | EXCLUDE         |
| Pearlson et al (2016)                                                  | Effects of Inhaled, Vaporized Cannabis on Functional MRI Signal and Behavior in a Simulated Driving Program                                                                                     | EXCLUDE         |
| Miller (2018)                                                          | In search of efficacy: A self-reported patient study identifying effective THC: CBD ratios for sleep, pain and arousal based on dose-controlled delivery of vaporized cannabis oil              | EXCLUDE         |
| Liu et al (2019)                                                       | Impairment of Endothelial Function by Aerosol From Marijuana Leaf Vaporizers                                                                                                                    | EXCLUDE         |
| Linder et al (2016)                                                    | Treatment of pediatric intractable epilepsy with vaporized cannabidiol (cbd) and delta(9)-tetrahydrocannabinol (thc)-preliminary findings of the israeli pediatric medical cannabis (mc) cohort | EXCLUDE         |
| Kloft et al (2020)                                                     | Hazy memories: cannabis vaping amplifies the creation of false memory                                                                                                                           | EXCLUDE         |
| Holub (2019)                                                           | Pulmonary Toxicity Associated with Vaping Marijuana                                                                                                                                             | EXCLUDE         |
| Cuccia et al (2020)                                                    | Cannabis use through e-cigarettes, including juul                                                                                                                                               | EXCLUDE         |
| Canales & Valverde (2020)                                              | Perceived harm and vaping/marijuana dual-use among latino and non-latino high school students in colorado                                                                                       | EXCLUDE         |
| Bouhlal et al (2017)                                                   | Effects of Smoked, Vaporized, and Oral Cannabis Administration on Appetitive Hormones and Relationships With Subjective Effects: A Clinical Study                                               | EXCLUDE         |
| Hamel-Senechal et al (2018)                                            | E-cigarette: a new fashionable, discreet, but risky way to misuse drugs                                                                                                                         | EXCLUDE         |
| Albrekton et al (2019)                                                 | The Dangers of Dabbing: A Case of ARDS Following Inhalation of Vaporized Butane-Extracted Cannabis Product                                                                                      | EXCLUDE         |
| Abdallah et al (2018)                                                  | Effect of inhaled vaporized cannabis on dynamic airway function, breathlessness and exercise intolerance in adults with advanced COPD: A randomized controlled trial                            | EXCLUDE         |
| Swortwood et al (2017)                                                 | On-site oral fluid $\Delta 9$ -tetrahydrocannabinol (THC) screening after controlled smoked, vaporized, and oral cannabis administration                                                        | EXCLUDE         |
| Spindle et al (2020)                                                   | Urinary Excretion Profile of 11-Nor-9-Carboxy- $\Delta 9$ -Tetrahydrocannabinol (THCCOOH) Following Smoked and Vaporized Cannabis Administration in Infrequent Cannabis Users                   | EXCLUDE         |
| Spindle et al (2018)                                                   | Acute Effects of Smoked and Vaporized Cannabis in Healthy Adults Who Infrequently Use Cannabis: A Crossover Trial                                                                               | EXCLUDE         |
| Sempio et al (2018)                                                    | Optimization of recombinant $\beta$ -glucuronidase hydrolysis and quantification of eight urinary cannabinoids and metabolites by liquid chromatography tandem mass spectrometry                | EXCLUDE         |
| Ponzoni et al (2019)                                                   | Increase of sensitivity to $\Delta(9)$ -THC-induced rewarding effects after seven-week exposure to electronic and tobacco cigarettes in mice                                                    | EXCLUDE         |
| Pomahacova et al (2009)                                                | Cannabis smoke condensate III: the cannabinoid content of vaporised Cannabis sativa                                                                                                             | EXCLUDE         |
| Nguyen et al (2018)                                                    | Tolerance to hypothermic and antinoceptive effects of $\Delta 9$ -tetrahydrocannabinol (THC) vapor inhalation in rats                                                                           | EXCLUDE         |
| Nguyen et al (2020)                                                    | Lasting effects of repeated $\Delta(9)$ -tetrahydrocannabinol vapour inhalation during adolescence in male and female rats                                                                      | EXCLUDE         |
| Nguyen et al (2020)                                                    | Explication of CB <sub>1</sub> receptor contributions to the hypothermic effects of $\Delta(9)$ -tetrahydrocannabinol (THC) when delivered by vapor inhalation or parenteral injection in rats  | EXCLUDE         |
| Nguyen et al (2016)                                                    | Inhaled delivery of $\Delta(9)$ -tetrahydrocannabinol (THC) to rats by e-cigarette vapor technology                                                                                             | EXCLUDE         |
| Hazekamp et al (2006)                                                  | Evaluation of a vaporizing device (Volcano) for the pulmonary administration of tetrahydrocannabinol                                                                                            | EXCLUDE         |
| Budney & Borodovsky (2017)                                             | The potential impact of cannabis legalization on the development of cannabis use disorders                                                                                                      | EXCLUDE         |
| Carlos et al (2019)                                                    | Vaping-associated Pulmonary Illness (VAPI)                                                                                                                                                      | EXCLUDE         |
| Tashkin (2018)                                                         | Vaping Cannabis and Chronic Obstructive Pulmonary Disease                                                                                                                                       | EXCLUDE         |
| Solowij (2018)                                                         | Peering Through the Haze of Smoked vs Vaporized Cannabis-To Vape or Not to Vape?                                                                                                                | EXCLUDE         |
| Smith, & Goniewicz (2020)                                              | The role of policy in the EVALI outbreak: solution or contributor?                                                                                                                              | EXCLUDE         |
| Singh & Lippmann (2018)                                                | Vaping medical marijuana                                                                                                                                                                        | EXCLUDE         |
| Ryan (2019)                                                            | Use of cannabis concentrates by adolescents                                                                                                                                                     | EXCLUDE         |
| Printz (2020)                                                          | Fighting the teen vaping epidemic: With rates of adolescent vaping on the rise, experts caution that new federal rules targeting e-cigarettes may not be strong enough                          | EXCLUDE         |
| Mahase (2019)                                                          | Marijuana use in e-cigarettes increases among US teens, studies find                                                                                                                            | EXCLUDE         |
| Lippmann & Singh (2017)                                                | Vaping marijuana?                                                                                                                                                                               | EXCLUDE         |
| King et al (2020)                                                      | The evali and youth vaping epidemics - Implications for public health                                                                                                                           | EXCLUDE         |
| Hooper & Garfield (2020)                                               | An emerging crisis: Vaping-associated pulmonary injury                                                                                                                                          | EXCLUDE         |
| Hindochoa et al (2016)                                                 | Vaping cannabis (marijuana) has the potential to reduce tobacco smoking in cannabis users                                                                                                       | EXCLUDE         |
| Hemings & Greaves (2018)                                               | New Challenges: Developing Gendered and Equitable Responses to Involuntary Exposures to Electronic Nicotine Delivery Systems (ENDS) and Cannabis Vaping                                         | EXCLUDE         |
| Gartner (2015)                                                         | Mull it over: cannabis vaporizers and harm reduction                                                                                                                                            | EXCLUDE         |
| Gartner et al (2020)                                                   | Miscommunication about the causes of the US outbreak of lung diseases in vapers by public health authorities and the media                                                                      | EXCLUDE         |
| Cirulis et al (2020)                                                   | Marijuana Legislation and Electronic Cigarette- or Vaping-Associated Lung Injury: A Historical Perspective                                                                                      | EXCLUDE         |
| Butt et al (2019)                                                      | Pathology of vaping-associated lung injury                                                                                                                                                      | EXCLUDE         |
| Budney et al (2015)                                                    | Vaping cannabis (marijuana): parallel concerns to e-digs?                                                                                                                                       | EXCLUDE         |
| Balmes (2019)                                                          | Vaping-induced acute lung injury: An epidemic that could have been prevented                                                                                                                    | EXCLUDE         |
| Alchin (2020)                                                          | Vaping psychosis': Ultra-acute onset of severe, persisting and unusual psychotic symptoms following first-time cannabis vaping in a previously well individual                                  | EXCLUDE         |
| Troutt & DiDonato (2017)                                               | Carbonyl Compounds Produced by Vaporizing Cannabis Oil Thinning Agents                                                                                                                          | EXCLUDE         |
| Swortwood et al (2017)                                                 | Cannabinoid disposition in oral fluid after controlled smoked, vaporized, and oral cannabis administration                                                                                      | EXCLUDE         |
| Nguyen et al (2018)                                                    | Tolerance to hypothermic and antinoceptive effects of Delta 9-tetrahydrocannabinol (THC) vapor inhalation in rats                                                                               | EXCLUDE         |
| Nguyen et al (2020)                                                    | Explication of CB <sub>2</sub> receptor contributions to the hypothermic effects of $\Delta 9$ -tetrahydrocannabinol (THC) when delivered by vapor inhalation or parenteral injection in rats   | EXCLUDE         |

|                               |                                                                                                                                                                                                                          |         |
|-------------------------------|--------------------------------------------------------------------------------------------------------------------------------------------------------------------------------------------------------------------------|---------|
| Nguyen et al (2016)           | Inhaled delivery of Delta(9)-tetrahydrocannabinol (THC) to rats by e-cigarette vapor technology                                                                                                                          | EXCLUDE |
| Newmeyer et al (2016)         | Free and Glucuronide Whole Blood Cannabinoids' Pharmacokinetics after Controlled Smoked, Vaporized, and Oral Cannabis Administration in Frequent and Occasional Cannabis Users: Identification of Recent Cannabis Intake | EXCLUDE |
| Mondino et al (2019)          | Vaporized Cannabis differentially modulates sexual behavior of female rats according to the dose                                                                                                                         | EXCLUDE |
| Leigh & Goniewicz (2020)      | Effect of aerosolized nicotine on human bronchial epithelial cells is amplified after co-administration with cannabidiol (CBD): a pilot in vitro study                                                                   | EXCLUDE |
| Javadi-Paydar et al (2019)    | Vapor inhalation of cannabidiol (CBD) in rats                                                                                                                                                                            | EXCLUDE |
| Freels et al (2020)           | Vaporized Cannabis Extracts Have Reinforcing Properties and Support Conditioned Drug-Seeking Behavior in Rats                                                                                                            | EXCLUDE |
| Berg et al (2015)             | Rules regarding marijuana and its use in personal residences: findings from marijuana users and nonusers recruited through social media                                                                                  | EXCLUDE |
| Hartman et al (2015)          | Cannabinoid disposition in oral fluid after controlled vaporizer administration with and without alcohol                                                                                                                 | EXCLUDE |
| Hall et al (2020)             | Lessons from the public health responses to the us outbreak of vaping-related lung injury                                                                                                                                | EXCLUDE |
| Abdallah et al (2018)         | Effect of Vaporized Cannabis on Exertional Breathlessness and Exercise Endurance in Advanced Chronic Obstructive Pulmonary Disease. A Randomized Controlled Trial                                                        | EXCLUDE |
| Varlet et al (2016)           | Drug vaping applied to cannabis: Is "Cannavaping" a therapeutic alternative to marijuana?                                                                                                                                | EXCLUDE |
| Van Dam & Earleywine (2010)   | Pulmonary function in cannabis users: Support for a clinical trial of the vaporizer                                                                                                                                      | EXCLUDE |
| Sumner et al (2020)           | Temporal Trends in Online Posts About Vaping of Cannabis Products                                                                                                                                                        | EXCLUDE |
| Suhling et al (2020)          | Three Patients With Acute Pulmonary Damage Following the Use of E-Cigarettes-A Case Series                                                                                                                               | EXCLUDE |
| Streck et al (2019)           | Modes of cannabis use: A secondary analysis of an intensive longitudinal natural history study                                                                                                                           | EXCLUDE |
| Spindle et al (2019)          | Acute Pharmacokinetic Profile of Smoked and Vaporized Cannabis in Human Blood and Oral Fluid                                                                                                                             | EXCLUDE |
| Spindle et al (2018)          | Acute effects of smoked and vaporized cannabis in healthy adults who infrequently use cannabis: a crossover trial (vol 1, e184841, 2018)                                                                                 | EXCLUDE |
| Spindle et al (2020)          | Pharmacodynamic effects of vaporized and oral cannabidiol (CBD) and vaporized CBD-dominant cannabis in infrequent cannabis users                                                                                         | EXCLUDE |
| Smith et al (2015)            | Release of toxic ammonia and volatile organic compounds by heated cannabis and their relation to tetrahydrocannabinol content                                                                                            | EXCLUDE |
| Silverman et al (2020)        | Vaping induced pneumonitis: A small community hospital's case series and analysis                                                                                                                                        | EXCLUDE |
| Neira et al (2020)            | Discordant bilateral bronchoalveolar lavage findings in a patient with acute eosinophilic pneumonia associated with counterfeit tetrahydrocannabinol oil vaping                                                          | EXCLUDE |
| Portman & Donovan (2020)      | Case of Pneumonitis Associated With Cannabis Vaping and Cancer Immunotherapy                                                                                                                                             | EXCLUDE |
| Popova et al (2017)           | Perceived harms and benefits of tobacco, marijuana, and electronic vaporizers among young adults in Colorado: implications for health education and research                                                             | EXCLUDE |
| Pomahacova et al (2009)       | Cannabis smoke condensate III: The cannabinoid content of vaporised Cannabis sativa Cannabinoid content of vaporised Cannabis sativa                                                                                     | EXCLUDE |
| Perrine et al (2019)          | Characteristics of a Multistate Outbreak of Lung Injury Associated with E-cigarette Use, or Vaping - United States, 2019                                                                                                 | EXCLUDE |
| Peace et al (2016)            | Analysis of a Commercial Marijuana e-Cigarette Formulation                                                                                                                                                               | EXCLUDE |
| Peace et al (2016)            | Evaluation of Two Commercially Available Cannabidiol Formulations for Use in Electronic Cigarettes                                                                                                                       | EXCLUDE |
| Ocampo-Gonzalez & Park (2020) | Cytologic features of vaping-induced lung injury: A case report                                                                                                                                                          | EXCLUDE |
| Zhang et al (2016)            | Tracking Dabbing Using Search Query Surveillance: A Case Study in the United States                                                                                                                                      | EXCLUDE |
| Yoo et al (2019)              | Perceptions of the Comparative Safety of Different Forms of Marijuana Use Among the Adult US Population                                                                                                                  | EXCLUDE |
| Yang et al (2018)             | How Is Marijuana Vaping Portrayed on YouTube? Content, Features, Popularity and Retransmission of Vaping Marijuana YouTube Videos                                                                                        | EXCLUDE |
| Xantus et al (2020)           | Smoldering ashes: burning questions after the outbreak of electronic cigarette or vaping-associated lung injury (EVALI)                                                                                                  | EXCLUDE |
| Wing et al (2020)             | Association of State Marijuana Legalization Policies for Medical and Recreational Use With Vaping-Associated Lung Disease                                                                                                | EXCLUDE |
| Nguyen et al (2020)           | Lasting effects of repeated increment (9)-tetrahydrocannabinol vapour inhalation during adolescence in male and female rats                                                                                              | EXCLUDE |
| Newmeyer et al (2017)         | Evaluation of divided attention psychophysical task performance and effects on pupil sizes following smoked, vaporized and oral cannabis administration                                                                  | EXCLUDE |
| Newmeyer et al (2017)         | Subjective and physiological effects, and expired carbon monoxide concentrations in frequent and occasional cannabis smokers following smoked, vaporized, and oral cannabis administration                               | EXCLUDE |
| Navon et al (2019)            | Risk Factors for E-Cigarette, or Vaping, Product Use-Associated Lung Injury (EVALI) Among Adults Who Use E-Cigarette, or Vaping, Products - Illinois, July-October 2019                                                  | EXCLUDE |
| Muthumalage et al (2020)      | Chemical Constituents Involved in E-Cigarette, or Vaping Product Use-Associated Lung Injury (EVALI)                                                                                                                      | EXCLUDE |
| Mondino et al (2019)          | Acute effect of vaporized Cannabis on sleep and electrocortical activity                                                                                                                                                 | EXCLUDE |
| Mokrysz et al (2016)          | Are adolescents more vulnerable to the harmful effects of cannabis than adults? A placebo-controlled study in human males                                                                                                | EXCLUDE |
| Miskoff & Chaudhri (2020)     | E-cigarette or Vaping Product Use-associated Lung Injury: A Case of an Adult Female Leading to Hospitalization                                                                                                           | EXCLUDE |
| Meyer & Burjonrappa (2020)    | Tetrahydrocannabinol (THC) cartridge ingestion                                                                                                                                                                           | EXCLUDE |
| Meehan-Atrash et al (2019)    | Aerosol Gas-Phase Components from Cannabis E-Cigarettes and Dabbing: Mechanistic Insight and Quantitative Risk Analysis                                                                                                  | EXCLUDE |
| Meacham et al (2018)          | Understanding emerging forms of cannabis use through an online cannabis community: An analysis of relative post volume and subjective highness ratings                                                                   | EXCLUDE |
| McDonald et al (2016)         | Traversing the triangulum: the intersection of tobacco, legalised marijuana and electronic vaporisers in Denver, Colorado                                                                                                | EXCLUDE |
| Massey et al (2020)           | Modifications to Electronic Nicotine Delivery Systems: Content Analysis of YouTube Videos                                                                                                                                | EXCLUDE |
| Manning et al (2020)          | Vaping Cannabis Oil: A Case of Catatonia Associated With Use of High-Potency Cannabis                                                                                                                                    | EXCLUDE |
| Majmundar et al (2020)        | Characterising KandyPens-related posts to Instagram: implications for nicotine and cannabis use                                                                                                                          | EXCLUDE |
| Luckett et al (2016)          | Clinical trials of medicinal cannabis for appetite-related symptoms from advanced cancer: a survey of preferences, attitudes and beliefs among patients willing to consider participation                                | EXCLUDE |
| Lewis et al (2019)            | E-cigarette Use, or Vaping, Practices and Characteristics Among Persons with Associated Lung Injury - Utah, April-October 2019                                                                                           | EXCLUDE |
| Knutzen et al (2018)          | Combustible and Electronic Tobacco and Marijuana Products in Hip-Hop Music Videos, 2013-2017                                                                                                                             | EXCLUDE |
| Ruchlemer et al (2015)        | Inhaled medicinal cannabis and the immunocompromised patient                                                                                                                                                             | EXCLUDE |
| Kinney et al (2020)           | Electronic-cigarette or vaping associated lung injury (EVALI)                                                                                                                                                            | EXCLUDE |

|                                |                                                                                                                                                                                      |         |
|--------------------------------|--------------------------------------------------------------------------------------------------------------------------------------------------------------------------------------|---------|
| Jackson et al (2019)           | It's all the rage! Exploring the nuances in the link between vaping and adolescent delinquency                                                                                       | EXCLUDE |
| Heinzerling et al (2020)       | Severe Lung Injury Associated With Use of e-Cigarette, or Vaping, Products-California, 2019                                                                                          | EXCLUDE |
| He et al (2017)                | Tree-in-Bloom: Severe Acute Lung Injury Induced by Vaping Cannabis Oil                                                                                                               | EXCLUDE |
| Hazekamp et al (2006)          | Evaluation of a vaporizing device (Volcano (R)) for the pulmonary administration of tetrahydrocannabinol                                                                             | EXCLUDE |
| Gay et al (2020)               | Vaping-Induced Lung Injury: A Case of Lipoid Pneumonia Associated with E-Cigarettes Containing Cannabis                                                                              | EXCLUDE |
| Galo et al (2020)              | A presentation of E-Cigarette vaping associated lung injury (EVALI) caused by THC-Containing electronic smoking device                                                               | EXCLUDE |
| Fonseca Fuentes et al (2019)   | VpALI—Vaping-related Acute Lung Injury: A New Killer Around the Block                                                                                                                | EXCLUDE |
| Fryman et al (2020)            | Acute Respiratory Failure Associated With Vaping                                                                                                                                     | EXCLUDE |
| Fischedick et al (2010)        | Cannabinoid receptor 1 binding activity and quantitative analysis of Cannabis sativa L. smoke and vapor                                                                              | EXCLUDE |
| Fedt et al (2020)              | Vaping-Associated Lung Injury: A New Cause of Acute Respiratory Failure                                                                                                              | EXCLUDE |
| Farra et al (2020)             | Acute neuroradiological, behavioral, and physiological effects of nose-only exposure to vaporized cannabis in C57BL/6 mice                                                           | EXCLUDE |
| Farokhnia et al (2020)         | Effects of oral, smoked, and vaporized cannabis on endocrine pathways related to appetite and metabolism: a randomized, double-blind, placebo-controlled, human laboratory study     | EXCLUDE |
| Essa et al (2020)              | Review of Cases of E-Cigarette or Vaping Product Use-Associated Lung Injury (EVALI) and Brief Review of the Literature                                                               | EXCLUDE |
| Earleywine & Van Dam (2010)    | Case studies in cannabis vaporization                                                                                                                                                | EXCLUDE |
| Duffy et al (2020)             | Analysis of Cannabinoid-Containing Fluids in Illicit Vaping Cartridges Recovered from Pulmonary Injury Patients: Identification of Vitamin E Acetate as a Major Diluent              | EXCLUDE |
| Drabkin & Heyligers (2020)     | Vaping-associated pulmonary disease (VAPD): An unusual pattern of CT findings                                                                                                        | EXCLUDE |
| Dicpinigaitis et al (2020)     | Vaping-Associated Acute Respiratory Failure Due to Acute Lipoid Pneumonia                                                                                                            | EXCLUDE |
| Davies et al (2019)            | The influence of cannabis smoke and cannabis vapour on simulated lung surfactant function under physiologically relevant conditions                                                  | EXCLUDE |
| Davidson et al (2019)          | Outbreak of Electronic-Cigarette-Associated Acute Lipoid Pneumonia - North Carolina, July-August 2019                                                                                | EXCLUDE |
| Daniulaityte et al (2015)      | "Time for dabs": Analyzing Twitter data on marijuana concentrates across the U.S                                                                                                     | EXCLUDE |
| Damiano & Catellier (2020)     | Up in smoke: a content analysis of tweets during the vaping-related illness epidemic                                                                                                 | EXCLUDE |
| Czaplicki et al (2020)         | #tootittletoolate: JUUL-related content on Instagram before and after self-regulatory action                                                                                         | EXCLUDE |
| Cobb & Solanki (2020)          | E-Cigarettes, Vaping Devices, and Acute Lung Injury                                                                                                                                  | EXCLUDE |
| Bidwell et al (2018)           | Exploring cannabis concentrates on the legal market: User profiles, product strength, and health-related outcomes                                                                    | EXCLUDE |
| Cavazos-Rehg et al (2014)      | Characterizing the followers and tweets of a marijuana-focused Twitter handle                                                                                                        | EXCLUDE |
| Camille et al (2020)           | Fatal e-cigarette or vaping associated lung injury (EVALI): A first case report in Europe                                                                                            | EXCLUDE |
| Barrington-Trimis et al (2020) | Characterizing the predictive validity of measures of susceptibility to future use of combustible, vaporized and edible cannabis products in adolescent never-users                  | EXCLUDE |
| Azcarate et al (2020)          | Medical Reasons for Marijuana Use, Forms of Use, and Patient Perception of Physician Attitudes Among the US Population                                                               | EXCLUDE |
| Aston et al (2019)             | Vaporization of Marijuana Among Recreational Users: A Qualitative Study                                                                                                              | EXCLUDE |
| Antwi-Amoabeng & Islam (2020)  | Vaping Is Not Safe: A Case of Acute Eosinophilic Pneumonia following Cannabis Vapor Inhalation                                                                                       | EXCLUDE |
| Ansari-Gilani et al (2020)     | E-cigarette use related lung disease, review of clinical and imaging findings in 3 cases                                                                                             | EXCLUDE |
| Anderson & Zechar (2019)       | Lung injury from inhaling butane hash oil mimics pneumonia                                                                                                                           | EXCLUDE |
| Alzghari et al (2017)          | To Dab or Not to Dab: Rising Concerns Regarding the Toxicity of Cannabis Concentrates                                                                                                | EXCLUDE |
| Hartman et al (2016)           | Controlled vaporized cannabis, with and without alcohol: subjective effects and oral fluid-blood cannabinoid relationships                                                           | EXCLUDE |
| Hartman et al (2015)           | Controlled Cannabis Vaporizer Administration: Blood and Plasma Cannabinoids with and without Alcohol                                                                                 | EXCLUDE |
| Gutsche et al (2020)           | A 19-Year-Old Man With Vaping-Associated Lung Injury                                                                                                                                 | EXCLUDE |
| Gunn et al (2020)              | Complex cannabis use patterns: Associations with cannabis consequences and cannabis use disorder symptomatology                                                                      | EXCLUDE |
| Ali et al (2020)               | Oral erosions associated with surreptitious marijuana vaping in an adolescent boy                                                                                                    | EXCLUDE |
| Ahmed et al (2020)             | Vaping Cannabis Butane Hash Oil Leads to Severe Acute Respiratory Distress Syndrome—A Case of EVALI in a Teenager With Hypertrophic Cardiomyopathy                                   | EXCLUDE |
| Adapa et al (2020)             | Cannabis Vaping—Induced Acute Pulmonary Toxicity: Case Series and Review of Literature                                                                                               | EXCLUDE |
| Abrams et al (2007)            | Vaporization as a smokeless cannabis delivery system: A pilot study                                                                                                                  | EXCLUDE |
| Abeles et al (2020)            | Vaping-associated lung injury caused by inhalation of cannabis oil                                                                                                                   | EXCLUDE |
| Taffe et al (2020)             | Effects of Δ9-Tetrahydrocannabinol (THC) Vapor Inhalation in Sprague-Dawley and Wistar Rats                                                                                          | EXCLUDE |
| Swortwood et al (2017)         | On-site oral fluid Delta(9)-tetrahydrocannabinol (THC) screening after controlled smoked, vaporized, and oral cannabis administration                                                | EXCLUDE |
| Spindle et al (2020)           | Urinary Excretion Profile of 11-Nor-9-Carboxy-Delta 9-Tetrahydrocannabinol (THCCOOH) Following Smoked and Vaporized Cannabis Administration in Infrequent Cannabis Users             | EXCLUDE |
| Spindle et al (2020)           | Urinary Pharmacokinetic Profile of Cannabinoids Following Administration of Vaporized and Oral Cannabidiol and Vaporized CBD-Dominant Cannabis                                       | EXCLUDE |
| Solowij et al (2018)           | Second-Hand Exposure of Staff Administering Vaporised Cannabinoid Products to Patients in a Hospital Setting                                                                         | EXCLUDE |
| Solowij et al (2019)           | A randomised controlled trial of vapourised Δ 9 -tetrahydrocannabinol and cannabidiol alone and in combination in frequent and infrequent cannabis users: acute intoxication effects | EXCLUDE |
| Sempio et al (2018)            | Optimization of recombinant -glucuronidase hydrolysis and quantification of eight urinary cannabinoids and metabolites by liquid chromatography tandem mass spectrometry             | EXCLUDE |
| Sempio et al (2019)            | Surface Detection of THC Attributable to Vaporizer Use in the Indoor Environment                                                                                                     | EXCLUDE |
| Schier et al (2019)            | Severe Pulmonary Disease Associated with Electronic-Cigarette-Product Use - Interim Guidance                                                                                         | EXCLUDE |
| Rogers et al (2020)            | Multidirectional Pathways of Tobacco and Marijuana Use, Including Comorbid Use, Among Young Adults (Aged 18 -25 Years) in Texas: A Six-Wave Cross-Lagged Model                       | EXCLUDE |
| Ponzonei et al (2019)          | Increased sensitivity to Delta(9)-THC-induced rewarding effects after seven-week exposure to electronic and tobacco cigarettes in mice                                               | EXCLUDE |

|                             |                                                                                                                                                                                                                       |         |
|-----------------------------|-----------------------------------------------------------------------------------------------------------------------------------------------------------------------------------------------------------------------|---------|
| Phillips et al (2020)       | Marijuana in pediatric and adult congenital heart disease heart transplant listing: A survey of provider practices and attitudes                                                                                      | EXCLUDE |
| Zuurman et al (2008)        | Effect of intrapulmonary tetrahydrocannabinol administration in humans                                                                                                                                                | EXCLUDE |
| Zuckermann et al (2020)     | Prevalence and correlates of youth poly-substance use in the COMPASS study                                                                                                                                            | EXCLUDE |
| Zuckermann et al (2019)     | Factors associated with cannabis use change in youth: Evidence from the COMPASS study                                                                                                                                 | EXCLUDE |
| Xantus & Kanizsai (2020)    | Vaping-associated lung injury                                                                                                                                                                                         | EXCLUDE |
| Wilsey et al (2016)         | A preliminary evaluation of the relationship of cannabinoid blood concentrations with the analgesic response to vaporized cannabis                                                                                    | EXCLUDE |
| Wilsey et al (2016)         | An Exploratory Human Laboratory Experiment Evaluating Vaporized Cannabis in the Treatment of Neuropathic Pain From Spinal Cord Injury and Disease                                                                     | EXCLUDE |
| Wilsey et al (2013)         | Low-dose vaporized cannabis significantly improves neuropathic pain                                                                                                                                                   | EXCLUDE |
| Nguyen et al (2019)         | Delta(9)-tetrahydrocannabinol attenuates oxycodone self-administration under extended access conditions                                                                                                               | EXCLUDE |
| Mayer et al (2020)          | Blunt and Non-Blunt Cannabis Use and Risk of Subsequent Combustible Tobacco Product Use Among Adolescents                                                                                                             | EXCLUDE |
| Martinasek et al (2018)     | Patterns, perception and behavior of electronic nicotine delivery systems use and multiple product use among young adults                                                                                             | EXCLUDE |
| Liu et al (2020)            | Model-based analysis on systemic availability of co-administered cannabinoids after controlled vaporized administration                                                                                               | EXCLUDE |
| Lanz et al (2016)           | Medicinal Cannabis: In Vitro Validation of Vaporizers for the Smoke-Free Inhalation of Cannabis                                                                                                                       | EXCLUDE |
| Kristjansson et al (2017)   | Prevalence of substance use among middle school-aged e-cigarette users compared with cigarette smokers, nonusers, and dual users: Implications for primary prevention                                                 | EXCLUDE |
| Kristjansson et al (2015)   | Licit and Illicit Substance Use by Adolescent E-Cigarette Users Compared with Conventional Cigarette Smokers, Dual Users, and Nonusers                                                                                | EXCLUDE |
| Kowal et al (2015)          | Dose-dependent effects of cannabis on the neural correlates of error monitoring in frequent cannabis users                                                                                                            | EXCLUDE |
| Kowal et al (2015)          | Cannabis and creativity: Highly potent cannabis impairs divergent thinking in regular cannabis users                                                                                                                  | EXCLUDE |
| Kowal et al (2017)          | Dose-dependent impact of vaporized cannabis on the neural correlates of monitoring of action errors and divergent thinking in regular cannabis users                                                                  | EXCLUDE |
| Javadi-Paydar et al (2018)  | Effects of Delta 9-THC and cannabidiol vapor inhalation in male and female rats                                                                                                                                       | EXCLUDE |
| Javadi-Paydar et al (2019)  | Effects of nicotine and THC vapor inhalation administered by an electronic nicotine delivery system (ENDS) in male rats                                                                                               | EXCLUDE |
| Huestis et al (2020)        | Free and Glucuronide Urine Cannabinoids after Controlled Smoked, Vaporized, and Oral Cannabis Administration in Frequent and Occasional Cannabis Users                                                                | EXCLUDE |
| Huestis et al (2019)        | Correlation of creatinine- and specific gravity-normalized free and glucuronidated urine cannabinoid concentrations following smoked, vaporized, and oral cannabis in frequent and occasional cannabis users          | EXCLUDE |
| Gilbert et al (2020)        | High school students rarely use e-cigarettes alone: A socio-demographic analysis of poly-substance use among adolescents in the USA                                                                                   | EXCLUDE |
| Gábor & László (2020)       | Vaping-associated lung injury                                                                                                                                                                                         | EXCLUDE |
| Freeman & Lorenzetti (2020) | Standard THC units: a proposal to standardize dose across all cannabis products and methods of administration                                                                                                         | EXCLUDE |
| Fanelli et al (2017)        | Cannabis and intractable chronic pain: an explorative retrospective analysis of Italian cohort of 614 patients                                                                                                        | EXCLUDE |
| Evans-Polce et al (2020)    | E-Cigarette and Cigarette Use Among U.S. Adolescents: Longitudinal Associations With Marijuana Use and Perceptions                                                                                                    | EXCLUDE |
| Cuttler & Spradlin (2017)   | Measuring cannabis consumption: Psychometric properties of the Daily Sessions, Frequency, Age of Onset, and Quantity of Cannabis Use Inventory (DFAQ-CU)                                                              | EXCLUDE |
| Baxter-Potter et al (2017)  | Self-Administration of Vaporized Cannabis Extracts Evokes Drug-Seeking Behavior and Supports Conditioned Reinforcement in Rats                                                                                        | EXCLUDE |
| Barrett et al (2018)        | Hallucinations Following Acute Cannabis Dosing: A Case Report and Comparison to Other Hallucinogenic Drugs                                                                                                            | EXCLUDE |
| Azagba (2018)               | E-cigarette use, dual use of e-cigarettes and tobacco cigarettes, and frequency of cannabis use among high school students                                                                                            | EXCLUDE |
| Arnell et al (2019)         | Cannabidiol (CBD) content in vaporized cannabis does not prevent tetrahydrocannabinol (THC)-induced impairment of driving and cognition                                                                               | EXCLUDE |
| Hartman et al (2016)        | Cannabis effects on driving longitudinal control with and without alcohol                                                                                                                                             | EXCLUDE |
| Hartman et al (2015)        | Cannabis effects on driving lateral control with and without alcohol                                                                                                                                                  | EXCLUDE |
| Hartman et al (2016)        | Effect of Blood Collection Time on Measured Delta(9)-Tetrahydrocannabinol Concentrations: Implications for Driving Interpretation and Drug Policy                                                                     | EXCLUDE |
| Han et al (2020)            | Electronic vapor products, marijuana use, smoking, and asthma in US adolescents                                                                                                                                       | EXCLUDE |
| Gomez et al (2019)          | Inhalation of marijuana affects Drosophila heart function                                                                                                                                                             | EXCLUDE |
| Abulseoud et al (2017)      | The acute effect of cannabis on plasma, liver and brain ammonia dynamics, a translational study                                                                                                                       | EXCLUDE |
| Abrams et al (2011)         | Cannabinoid-opioid interaction in chronic pain                                                                                                                                                                        | EXCLUDE |
| Abrams et al (2020)         | Effect of Inhaled Cannabis for Pain in Adults With Sickle Cell Disease: A Randomized Clinical Trial                                                                                                                   | EXCLUDE |
| Kaur et al (2020)           | Associations between digital technology and substance use among U.S. adolescents: Results from the 2018 Monitoring the Future survey                                                                                  | EXCLUDE |
| Gieringer et al (2004)      | Cannabis vaporizer combines efficient delivery of THC with effective suppression of pyrolytic compounds                                                                                                               | EXCLUDE |
| Habib & Levinger (2020)     | Characteristics of medical cannabis usage among patients with fibromyalgia                                                                                                                                            | EXCLUDE |
| Varlet (2016)               | Drug Vaping: From the Dangers of Misuse to New Therapeutic Devices                                                                                                                                                    | EXCLUDE |
| Traboulsi et al (2020)      | Inhalation Toxicology of Vaping Products and Implications for Pulmonary Health                                                                                                                                        | EXCLUDE |
| Thakrar et al (2020)        | E-cigarette, or vaping, product use-associated lung injury in adolescents: a review of imaging features                                                                                                               | EXCLUDE |
| Struble et al (2019)        | Beyond the Bud: Emerging Methods of Cannabis Consumption for Youth                                                                                                                                                    | EXCLUDE |
| Stogner & Miller (2015)     | Assessing the dangers of "dabbing": Mere marijuana or harmful new trend?                                                                                                                                              | EXCLUDE |
| Peters & Chien (2018)       | Contemporary routes of cannabis consumption: A primer for clinicians                                                                                                                                                  | EXCLUDE |
| Xantus (2020)               | Vaping-associated lung injury - VAI facts, assumptions and opportunities: Review of the present situation                                                                                                             | EXCLUDE |
| Mohiuddin et al (2020)      | Adherence to Consolidated Standards of Reporting Trials (CONSORT) Guidelines for Reporting Safety Outcomes in Trials of Medical Cannabis and Cannabis-based Medicines for Chronic Noncancer Pain: A Systematic Review | EXCLUDE |
| Kligerman et al (2020)      | Radiologic, Pathologic, Clinical, and Physiologic Findings of Electronic Cigarette or Vaping Product Use-associated Lung Injury (EVALI): Evolving Knowledge and Remaining Questions                                   | EXCLUDE |
| Ind (2020)                  | E-cigarette or vaping product use-associated lung injury                                                                                                                                                              | EXCLUDE |

|                             |                                                                                                                                                                         |         |
|-----------------------------|-------------------------------------------------------------------------------------------------------------------------------------------------------------------------|---------|
| Gieringer (2012)            | Cannabis "Vaporization": A promising strategy for Smoke Harm Reduction                                                                                                  | EXCLUDE |
| Civiletto et al (2020)      | Electronic Delivery (Vaping) Of Cannabis And Nicotine                                                                                                                   | EXCLUDE |
| Cherian et al (2020)        | E-Cigarette or Vaping Product-Associated Lung Injury: A Review                                                                                                          | EXCLUDE |
| Chaaban (2020)              | Acute eosinophilic pneumonia associated with non-cigarette smoking products: a systematic review                                                                        | EXCLUDE |
| Blundell et al (2018)       | The dark cloud of recreational drugs and vaping                                                                                                                         | EXCLUDE |
| Archie & Cucullo (2020)     | Cerebrovascular and Neurological Dysfunction under the Threat of COVID-19: Is There a Comorbid Role for Smoking and Vaping?                                             | EXCLUDE |
| Abrams (2016)               | Integrating cannabis into clinical cancer care                                                                                                                          | EXCLUDE |
| Dave et al (2020)           | News that takes your breath away: risk perceptions during an outbreak of vaping-related lung injuries                                                                   | EXCLUDE |
| Uddin et al (2020)          | Prevalence, Trends, and Distribution of Nicotine and Marijuana use in E-cigarettes among US adults: The Behavioral Risk Factor Surveillance System 2016–2018            | EXCLUDE |
| Trivers et al (2018)        | Prevalence of Cannabis Use in Electronic Cigarettes Among US Youth                                                                                                      | INCLUDE |
| Trivers et al (2019)        | Substances used in electronic vapor products among adults in the United States, 2017                                                                                    | EXCLUDE |
| Thurtle et al (2017)        | Prevalence of Use of Electronic Nicotine Delivery Systems (ENDS) to Vape Recreational Drugs by Club Patrons in South London                                             | EXCLUDE |
| Terry-McElrath et al (2020) | Changes in the Order of Cigarette and Marijuana Initiation and Associations with Cigarette Use, Nicotine Vaping, and Marijuana Use: U.S. 12th Grade Students, 2000–2019 | EXCLUDE |
| Tankersley et al (2019)     | Risk factors for illicit substance vaporizer use in adolescents                                                                                                         | EXCLUDE |
| Sznitman (2017)             | Do recreational cannabis users, unlicensed and licensed medical cannabis users form distinct groups?                                                                    | EXCLUDE |
| Steigerwald et al (2018)    | Smoking, Vaping, and Use of Edibles and Other Forms of Marijuana Among U.S. Adults                                                                                      | EXCLUDE |
| Smith et al (2020)          | Modes of delivery in concurrent nicotine and cannabis use ("co-use") among youth: Findings from the International Tobacco Control (ITC) Survey                          | EXCLUDE |
| Singh et al (2016)          | Modes of ever marijuana use among adult tobacco users and non-tobacco users—Styles 2014                                                                                 | EXCLUDE |
| Shiplo et al (2016)         | Medical cannabis use in Canada: vapourization and modes of delivery                                                                                                     | EXCLUDE |
| Seaman et al (2020)         | Use of tobacco products/devices for marijuana consumption and association with substance use problems among U.S. young adults (2015–2016)                               | EXCLUDE |
| Schneider et al (2019)      | Patterns of Co-occurring Modes of Marijuana Use Among Colorado High School Students                                                                                     | EXCLUDE |
| Schauer et al (2020)        | Modes of marijuana use - smoking, vaping, eating, and dabbing: Results from the 2016 BRFSS in 12 States                                                                 | EXCLUDE |
| Schauer et al (2016)        | Toking, Vaping, and Eating for Health or Fun: Marijuana Use Patterns in Adults, U.S., 2014                                                                              | EXCLUDE |
| Peters et al (2018)         | Prevalence and Sociodemographic Correlates of Adolescent Use and Polyuse of Combustible, Vaporized, and Edible Cannabis Products                                        | INCLUDE |
| Patrick et al (2020)        | Trends in Marijuana Vaping and Edible Consumption From 2015 to 2018 Among Adolescents in the US                                                                         | EXCLUDE |
| Pacula et al (2016)         | In the weeds: a baseline view of cannabis use among legalizing states and their neighbours                                                                              | EXCLUDE |
| Nicksic et al (2020)        | Cannabis legalization, tobacco prevention policies, and Cannabis use in E-cigarettes among youth                                                                        | EXCLUDE |
| Zarrabi et al (2020)        | Perception of Benefits and Harms of Medical Cannabis among Seriously Ill Patients in an Outpatient Palliative Care Practice                                             | EXCLUDE |
| Young-Wolff et al (2020)    | Routes of cannabis administration among females in the year before and during pregnancy: Results from a pilot project                                                   | EXCLUDE |
| Wong et al (2019)           | Measuring characteristics of e-cigarette consumption among college students                                                                                             | EXCLUDE |
| Wheeler et al (2020)        | CBD (Cannabidiol) Product Attitudes, Knowledge, and Use Among Young Adults                                                                                              | EXCLUDE |
| Nguyen et al (2019)         | Past 30-day co-use of tobacco and marijuana products among adolescents and young adults in California                                                                   | INCLUDE |
| Morean et al (2017)         | Predictors of Adult E-Cigarette Users Vaporizing Cannabis Using E-Cigarettes and Vape-Pens                                                                              | EXCLUDE |
| Morean & Lederman (2019)    | Prevalence and correlates of medical cannabis patients' use of cannabis for recreational purposes                                                                       | EXCLUDE |
| Morean et al (2015)         | High School Students' Use of Electronic Cigarettes to Vaporize Cannabis                                                                                                 | INCLUDE |
| Miech et al (2020)          | Trends in Reported Marijuana Vaping among US Adolescents, 2017–2019                                                                                                     | INCLUDE |
| Merianos et al (2019)       | Characteristics of Daily E-Cigarette Use and Acquisition Means Among a National Sample of Adolescents                                                                   | EXCLUDE |
| Mammen et al (2016)         | Vaporizing cannabis through e-cigarettes: Prevalence and socio-demographic correlates among Ontario high school students                                                | INCLUDE |
| Malouff et al (2014)        | Experiences of marijuana-vaporizer users                                                                                                                                | EXCLUDE |
| Leventhal et al (2020)      | Psychiatric comorbidity in adolescent use and poly-use of combustible, vaporized, and edible cannabis products                                                          | INCLUDE |
| Lee et al (2016)            | Online survey characterizing vaporizer use among cannabis users                                                                                                         | EXCLUDE |
| Kreitzberg et al (2019)     | Exposure to ENDS advertising and use of marijuana in ENDS among college students                                                                                        | EXCLUDE |
| Kowitz et al (2019)         | Vaping cannabis among adolescents: prevalence and associations with tobacco use from a cross-sectional study in the USA                                                 | INCLUDE |
| Kolar et al (2020)          | Routes of cannabis administration among adolescents during criminal prohibition of cannabis in Canada                                                                   | EXCLUDE |
| Knapp et al (2019)          | Emerging Trends in Cannabis Administration Among Adolescent Cannabis Users                                                                                              | INCLUDE |
| Ross et al (2019)           | Vape Factor Fast Find-Adult (VF3-A): a prototype survey method for recording brand-specific vaping factors in adult populations                                         | EXCLUDE |
| Kenne et al (2017)          | The Use of Substances Other Than Nicotine in Electronic Cigarettes Among College Students                                                                               | EXCLUDE |
| Kastaun et al (2020)        | Electronic Cigarettes to Vaporize Cannabis: Prevalence of Use and Associated Factors among Current Electronic Cigarette Users in Germany (DEBRA Study)                  | EXCLUDE |
| Jones et al (2018)          | Comparison of the locations where young adults smoke, vape, and eat/drink cannabis: Implications for harm reduction                                                     | EXCLUDE |
| Jones et al (2016)          | Prevalence and correlates of vaping cannabis in a sample of young adults                                                                                                | EXCLUDE |
| Johnson et al (2016)        | Usual modes of marijuana consumption among high school students in Colorado                                                                                             | INCLUDE |
| Jackson et al (2020)        | Do youth who vape exhibit risky health lifestyles? Monitoring the future, 2017                                                                                          | EXCLUDE |
| Hoffenberg et al (2018)     | Marijuana Use by Adolescents and Young Adults with Inflammatory Bowel Disease                                                                                           | EXCLUDE |

|                                |                                                                                                                                                 |         |
|--------------------------------|-------------------------------------------------------------------------------------------------------------------------------------------------|---------|
| Hindocha et al (2016)          | No Smoke without Tobacco: A Global Overview of Cannabis and Tobacco Routes of Administration and Their Association with Intention to Quit       | EXCLUDE |
| Highet et al (2020)            | Tetrahydrocannabinol and Cannabidiol Use in an Outpatient Palliative Medicine Population                                                        | EXCLUDE |
| Hazekamp et al (2013)          | The Medicinal Use of Cannabis and Cannabinoids - An International Cross-Sectional Survey on Administration Forms                                | EXCLUDE |
| Frohe et al (2018)             | Correlates of cannabis vape-pen use and knowledge among U.S. college students                                                                   | EXCLUDE |
| Fataar & Hammond (2019)        | The Prevalence of Vaping and Smoking as Modes of Delivery for Nicotine and Cannabis among Youth in Canada, England and the United States        | EXCLUDE |
| Boisvert et al (2020)          | Subjective effects of combustible, vaporized, and edible cannabis: Results from a survey of adolescent cannabis users                           | EXCLUDE |
| Etter (2015)                   | Electronic cigarettes and cannabis: An exploratory study                                                                                        | EXCLUDE |
| Eggers et al (2017)            | Youth use of electronic vapor products and blunts for administering cannabis                                                                    | INCLUDE |
| Earleywine & Barnwell (2007)   | Decreased respiratory symptoms in cannabis users who vaporize                                                                                   | EXCLUDE |
| Dugas et al (2020)             | Type of e-liquid vaped, poly-nicotine use and nicotine dependence symptoms in young adult e-cigarette users: A descriptive study                | EXCLUDE |
| Doggett et al (2020)           | Modes of cannabis use among Canadian youth in the COMPASS study; using LCA to examine patterns of smoking, vaping, and eating/drinking cannabis | INCLUDE |
| Dai & Siahpush (2020)          | Use of E-Cigarettes for Nicotine, Marijuana, and Just Flavoring Among U.S. Youth                                                                | EXCLUDE |
| Dai et al (2020)               | Self-reported Marijuana Use in Electronic Cigarettes among US Youth, 2017 to 2018                                                               | INCLUDE |
| Cuttler et al (2016)           | Sex Differences in Cannabis Use and Effects: A Cross-Sectional Survey of Cannabis Users                                                         | EXCLUDE |
| Cranford et al (2016)          | Prevalence and correlates of "Vaping" as a route of cannabis administration in medical cannabis patients                                        | EXCLUDE |
| Costiniuk et al (2019)         | Cannabis Consumption in People Living with HIV: Reasons for Use, Secondary Effects, and Opportunities for Health Education                      | EXCLUDE |
| Cassidy et al (2018)           | Initiation of vaporizing cannabis: Individual and social network predictors in a longitudinal study of young adults                             | EXCLUDE |
| Campbell et al (2020)          | Correlates of lifetime blunt/spliff use among cigarette smokers in substance use disorders treatment                                            | EXCLUDE |
| Borodovsky et al (2017)        | U.S. cannabis legalization and use of vaping and edible products among youth                                                                    | EXCLUDE |
| Borodovsky et al (2016)        | Smoking, vaping, eating: Is legalization impacting the way people use cannabis?                                                                 | EXCLUDE |
| Boehnke et al (2019)           | Cannabis Use Preferences and Decision-making Among a Cross-sectional Cohort of Medical Cannabis Patients with Chronic Pain                      | EXCLUDE |
| Bentivegna et al (2020)        | Electronic Cigarettes Associated With Incident and Polysubstance Use Among Youth                                                                | INCLUDE |
| Barrington-Trimis et al (2020) | Risk of Persistence and Progression of Use of 5 Cannabis Products After Experimentation Among Adolescents                                       | INCLUDE |
| Baldassarri et al (2020)       | Marijuana Vaping in U.S. Adults: Evidence From the Behavioral Risk Factor Surveillance System                                                   | EXCLUDE |
| Aston et al (2019)             | A qualitative analysis of cannabis vaporization among medical users                                                                             | EXCLUDE |
| Hakkarainen (2016)             | Vaporizing the pot world - easy, healthy, and cool                                                                                              | EXCLUDE |
| Goodman et al (2020)           | Prevalence and forms of cannabis use in legal vs. illegal recreational cannabis markets                                                         | EXCLUDE |



| <b>eAppendix 8. Included studies from citation screening</b> |                                                                                                                       |                 |
|--------------------------------------------------------------|-----------------------------------------------------------------------------------------------------------------------|-----------------|
| <b>Study</b>                                                 | <b>Title</b>                                                                                                          | <b>Decision</b> |
| Daniulaitye et al (2018)                                     | A Twitter-based survey on marijuana concentrate use                                                                   | EXCLUDE         |
| Daniulaitye et al (2017)                                     | Characterizing marijuana concentrate users: A web-based survey                                                        | EXCLUDE         |
| Miech et al (2017)                                           | What are kids vaping? Results from a national survey of US adolescents                                                | EXCLUDE         |
| Sutherland et al (2016)                                      | Tobacco and e-cigarette use amongst illicit drug users in Australia                                                   | EXCLUDE         |
| Johnson et al (2016)                                         | Usual Modes of Marijuana Consumption Among High School Students in Colorado                                           | EXCLUDE         |
| Pergam et al (2017)                                          | Cannabis use among patients at a comprehensive cancer center in a state with legalized medicinal and recreational use | EXCLUDE         |
| Reynolds et al (2018)                                        | Characteristics and Patterns of Marijuana Use in Community-Dwelling Older Adults                                      | EXCLUDE         |
| Chan et al (2017)                                            | User characteristics and effect profile of Butane Hash Oil: An extremely high-potency cannabis concentrate            | EXCLUDE         |
| Wardell et al (2021)                                         | Prevalence and Correlates of Medicinal Cannabis Use Among Adolescents                                                 | INCLUDE         |
| Kritikos et al (2021)                                        | Past 30-Day Marijuana Vaping: Prevalence and Predictors of Use in a Nationally Representative Study of U.S. Youth     | EXCLUDE         |
| Sharma et al (2021)                                          | Electronic Vaping Product Use among Young Adults Who Receive Care at a Major Medical Institution                      | EXCLUDE         |
| Hammond et al (2021)                                         | Prevalence and modes of cannabis use among youth in Canada, England, and the US, 2017 to 2019                         | INCLUDE         |
| Sexton et al (2016)                                          | A Cross-Sectional Survey of Medical Cannabis Users: Patterns of Use and Perceived Efficacy                            | EXCLUDE         |
|                                                              |                                                                                                                       |                 |

eFigure. Funnel plot lifetime, 12-month and 30-day prevalence

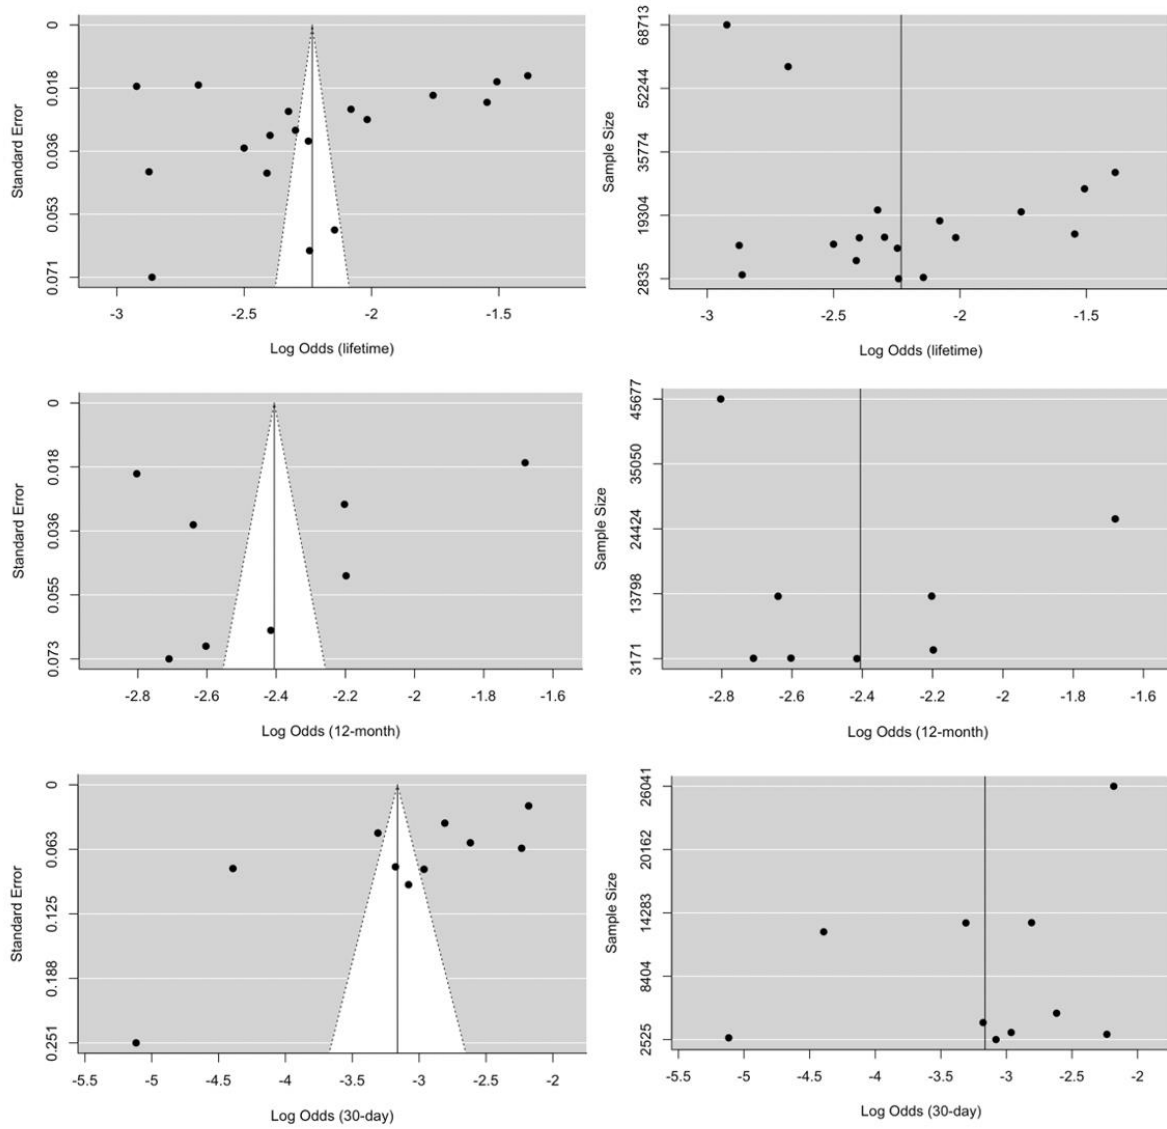

Supplement: jamapediatr-e214102-s001.pdf [file jamapediatr-e214102-s001.pdf]
